# Supplementary material for: Proof of concept for real-time detection of SARS CoV-2 infection with an electronic nose
Source: PubMed Central journal article supplement (PMC8172018; doi:10.1371/journal.pone.0252121), 2021-06-02
Supplement: pone.0252121.s003.pdf [file pone.0252121.s003.pdf]

**Supplementary Materials for:**

**Proof of Concept for Real-Time Detection of SARS CoV-2 Infection with an Electronic Nose**

Kobi Snitz<sup>1</sup>, Michal Andelman-Gur<sup>1</sup>, Liron Pinchover<sup>1</sup>, Reut Weissgross<sup>1</sup>, Aharon Weissbrod<sup>1</sup>,  
Eva Mishor<sup>1</sup>, Roni Zoller<sup>1</sup>, Vera Linetsky<sup>1</sup>, Abebe Medhanie<sup>1</sup>, Sagit Shushan<sup>1,2</sup>, Eli Jaffe<sup>3</sup>,  
Noam Sobel<sup>1</sup>

<sup>1</sup>Department of Neurobiology and Azrieli Center for Human Brain Imaging and Research, Weizmann Institute of Science, Rehovot, Israel. <sup>2</sup>Department of Otolaryngology & Head and Neck Surgery, Edith Wolfson Medical Center, Holon, Israel. <sup>3</sup>Magen David Adom in Israel and Department of Emergency Medicine, Ben-Gurion University of the Negev, Beer Sheva, Israel.

**In addition to this document, the supplementary materials include an online video and a zipped directory including all the data and code**

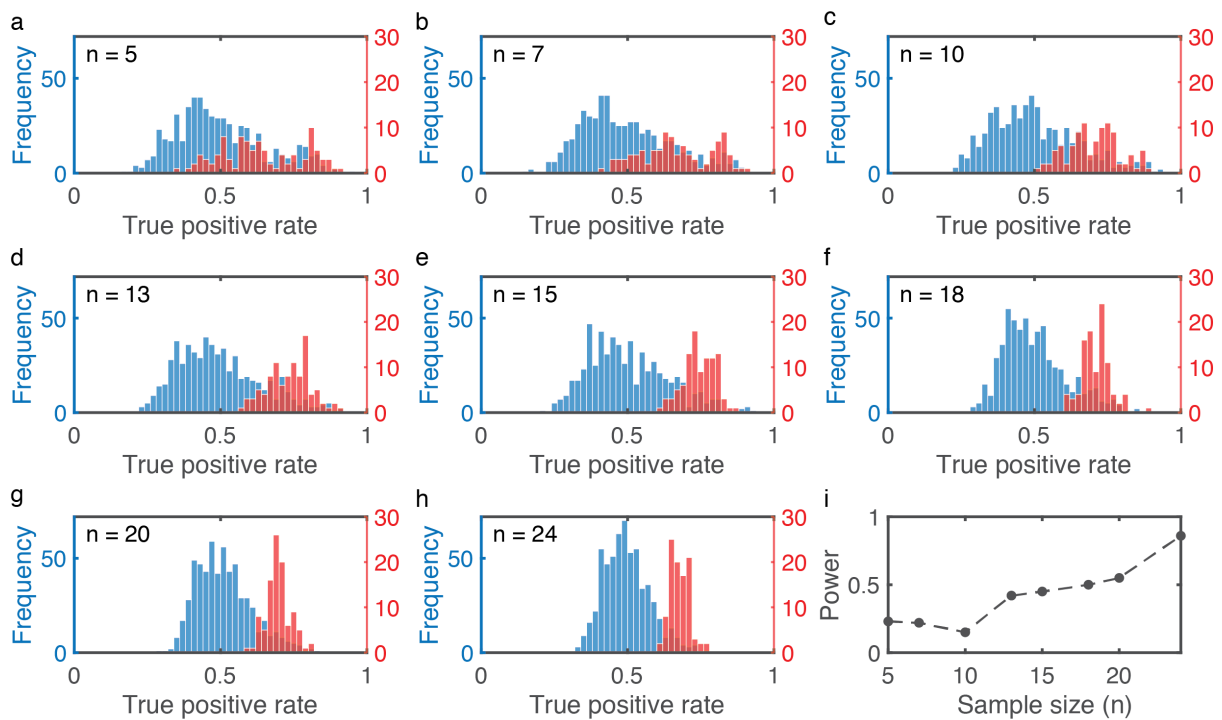

### Supplementary Figure 1: Power at different sample sizes

To calculate the power of our experiment with 27 positive participants we performed the 600-fold bootstrap described in the text for assigning a p value, but now using samples of different size. Thus, the power of the experiment at 5 positive samples was the proportion of selections of 5 positive samples which resulted in significant classifier performance. And so on for 7,10,13, and so on.

### Supplementary Video Online

A video demonstrating activity at the drive-through. The person being tested is an experimenter demonstrating, and not a participant.

### Supplementary Materials Data and Code folder

A folder containing all the raw data, the code, and a readme file explaining how to run it.
